# Supplementary material
Source: publisher figshare collection journal article supplement (https://gsajournals.figshare.com/ndownloader/files/24436331)
Supplement: Supplementary file 1 [file 24436331]

## Sheet: S.Table1
Table S1
Deficiency	Bloomington Stock #	deficiency Normal/Mild	Deficiency moderate	Deficiency Severe	Deficiency defective total	Deficiency Total	Control Normal/Mild	Control Moderate	Control Severe	Control defective total	Control Total
Df(3L)ED4674	8098	5	115	99	214	219	65	37	0	37	102
Df(3L)BSC449	24953	7	83	47	130	137	94	29	1	30	124
Df(3L)BSC371	24395	43	109	15	124	167	159	22	1	23	182
Df(3L)BSC289	23674	47	109	18	127	174	159	22	1	23	182
Df(3L)BSC223	9700	46	67	30	97	143	159	22	1	23	182
Df(3L)BSC23	6755	133	5	0	5	138	55	60	8	68	123
Df(3L)ED208	8059	2	120	5	125	127	93	105	0	105	198
Df(3L)BSC553	25116	25	72	27	99	124	94	29	1	30	124
Df(3L)BSC375	24399	109	118	2	120	229	159	22	1	23	182
Df(3L)BSC368	24392	53	68	1	69	122	159	22	1	23	182
Df(3L)BSC774	27346	60	100	22	122	182	92	24	0	24	116
Df(3L)BSC730	26828	46	76	1	77	123	92	24	0	24	116
Df(3L)BSC224	9701	121	74	11	85	206	159	22	1	23	182
Df(3L)Exel8104	7929	17	102	8	110	127	93	105	0	105	198
Df(3L)BSC451	24955	39	60	3	63	102	94	29	1	30	124
Df(3L)ED230	8089	182	19	0	19	201	65	37	0	37	102
Df(3L)ED4475	8069	4	111	32	143	147	38	106	3	109	147
Df(3L)ED4457	9355	161	10	1	11	172	67	29	0	29	96
Df(3L)ED229	8087	8	139	12	151	159	38	106	3	109	147
Df(3L)BSC27	6867	145	42	0	42	187	195	12	0	12	207
Df(3L)BSC414	24918	122	8	0	8	130	67	29	0	29	96
Df(3L)ED4287	8096	47	89	6	95	142	65	37	0	37	102
Df(3L)ED4483	8070	36	76	2	78	114	65	37	0	37	102
Df(3L)ED4502	8097	41	82	2	84	125	65	37	0	37	102
Df(3L)BSC362	24386	137	5	0	5	142	118	32	1	33	151
Df(3L)BSC118	8975	43	62	5	67	110	67	29	0	29	96
Df(3L)ED4341	8060	35	108	2	110	145	93	105	0	105	198
Df(3L)ED4978	8101	52	83	6	89	141	65	37	0	37	102
Df(3L)ED201	8047	38	109	0	109	147	93	105	0	105	198
Df(3L)BSC389	24413	86	55	4	59	145	128	31	1	32	160
Df(3L)ED210	8061	11	117	6	123	134	38	106	3	109	147
Df(3L)BSC220	9697	142	50	5	55	197	159	22	1	23	182
Df(3L)BSC33	6964	103	32	4	36	139	64	49	9	58	122
Df(3L)BSC672	26524	61	34	16	50	111	94	29	1	30	124
Df(3L)ED4606	8078	134	25	1	26	160	195	12	0	12	207
Df(3L)6B-29+Df(3R)6B-29	2596	89	44	5	49	138	55	60	8	68	123
Df(3L)ED4196	8050	61	47	1	48	109	170	61	1	62	232
Df(3L)BSC419	24923	76	8	1	9	85	67	29	0	29	96
Df(3L)ED4470	8068	11	96	3	99	110	38	106	3	109	147
Df(3L)AC1	997	74	8	0	8	82	170	61	1	62	232
Df(3L)Exel6132	7611	109	59	0	59	168	128	31	1	32	160
Df(3L)ED4543	8073	58	83	3	86	144	38	106	3	109	147
Df(3L)ED50002	24627	128	14	0	14	142	128	31	1	32	160
Df(3L)ED4421	8066	14	81	6	87	101	38	106	3	109	147
Df(3L)ED217	8074	14	81	6	87	101	38	106	3	109	147
Df(3L)Exel6109	7588	172	22	0	22	194	128	31	1	32	160
Df(3L)BSC181	9693	96	69	6	75	171	67	29	0	29	96
Df(3L)BSC845	27888	45	18	6	24	69	92	24	0	24	116
Df(3L)ED4293	8058	113	64	0	64	177	170	61	1	62	232
Df(3L)BSC673	26525	105	10	3	13	118	92	24	0	24	116
Df(3L)BSC884	30589	111	14	0	14	125	92	24	0	24	116
Df(3L)Exel6085	7564	34	68	2	70	104	55	60	8	68	123
Df(3L)BSC411	24915	89	43	4	47	136	94	29	1	30	124
Df(3L)Exel6112	7591	90	19	1	20	110	170	61	1	62	232
Df(3L)ED4858	8088	98	39	0	39	137	128	31	1	32	160
Df(3L)BSC410	24914	89	17	0	17	106	94	29	1	30	124
Df(3L)BSC392	24416	127	26	2	28	155	159	22	1	23	182
Df(3L)Exel6092	7571	97	47	1	48	145	170	61	1	62	232
Df(3L)BSC816	27577	122	22	0	22	144	92	24	0	24	116
Df(3L)BSC119	8976	68	38	3	41	109	67	29	0	29	96
Df(3L)ED4486	8072	33	113	11	124	157	38	106	3	109	147
Df(3L)BSC117	8974	84	28	0	28	112	67	29	0	29	96
Df(3L)BSC839	27917	267	81	1	82	349	92	24	0	24	116
Df(3L)BSC815	27576	37	7	0	7	44	92	24	0	24	116
Df(3L)BSC671	26523	95	26	1	27	122	94	29	1	30	124
Df(3L)BSC797	27369	129	30	0	30	159	92	24	0	24	116
Df(3L)Aprt-32	5411	63	50	11	61	124	64	49	9	58	122
Df(3L)BSC12	6457	69	43	16	59	128	64	49	9	58	122
Df(3L)ED5017	8102	73	44	0	44	117	65	37	0	37	102
Df(3L)BSC800	27372	100	11	0	11	111	80	10	0	10	90
Df(3L)BSC391	24415	138	21	0	21	159	159	22	1	23	182
Df(3L)1-16	7002	84	74	5	79	163	48	40	4	44	92

## Sheet: Sheet1
Deficiency or RNAi	Bloomington Stock #	Crossed with:	Deficiency Normal/Mild	Deficiency Moderate	Deficiency Severe	Deficiency Total	Control Normal/mild	Control Moderate	Control Severe	Control Total	cross	p-value
Df(3L)ED4674*	8098	W1118	238	24	0	262					W1118Xdf
Df(3L)ED4674*	8098	C415Gal4	7	36	29	72	155	49	10	214	C415Gal4DF
Df(3L) ED223	8079	Idgf3OE	31	172	49	252	175	15	0	190	NarrowingDownDFs	1.4987e-61	Enhancer
Df(3L) Exel6130	7609	Idgf3OE	41	41	88	170	175	15	0	190	NarrowingDownDFs	7.47124e-39	Enhancer
Df(3L) Exel6130	7609	C415Gal4	34	166	68	268	141	60	4	205	RNAiC415Gal4Idgf3
Df(3L) ED4685	64121	W1118	91	3	1	95					C415Gal4DF
Df(3L) ED4685	64121	C415Gal4	149	25	0	174	155	49	10	214	C415Gal4DF	0.002	Suppressor
Df(3L) ED4606*	8078
Df(3L) Exel9002	7935	Idgf3OE	80	40	2	122	104	73	4	181	Kenny's data df7935	0.194
Df(3L) Exel9004	7937	Idgf3OE	59	17	0	76	175	15	0	190	NarrowingDownDFs	0.002
Df(3L) BSC414	24918	Idgf3OE	99	45	5	149	111	21	1	133	NarrowingDownDf24918	0.001
B31901	B31901	Idgf3OE	78	39	3	120	59	63	3	125	Cy2Gal4xRNAi
B31901	B31901	C415Gal4	165	27	2	194	141	60	4	205	RNAiC415Gal4Idgf3
B51908	B51908	Idgf3OE	101	62	3	166	59	63	3	125	Cy2Gal4xRNAi
B51908	B51908	C415Gal4	90	91	2	183	141	60	4	205	RNAiC415Gal4Idgf3
V100567	V100567	Idgf3OE	83	65	1	149	79	34	1	114	RNAiCross3
V103559	V103559	IDGF3-Gal80 25C	169	132	3	304	73	39	1	113	eIF3eRNAixIdgf3OE
V103559	V103559	Cy2GaAL4-Gal80 25C	90	45	2	137	219	12	6	237	eIF3eRNAixIdgf3OE
B57483	B57483	Idgf3OE	119	17	1	137	46	24	1	71	df57483
B57483	B57483	Cy2Gal4	96	6	2	104					df57483
B33382	B33382	IDgf3OE	106	32	1	139	59	63	3	125	Cy2Gal4xRNAi
B33382	B33382	C41Gal4	134	37	3	174	141	60	4	205	RnaixC415Gal4Idgf3
B52980	B52980	Idgf3OE	31	4	0	35	Lost	Lost	Lost		Cy2Gal4xRNAi
B52980	B52980	C41Gal4	116	86	3	205	141	60	4	205	RNAixC415Gal4Idgf3
Df(3L)BSC289*	23674	W1118
Df(3L)BSC426	24930	Idgf3OE	32	83	2	117	68	31	3	102	2ndCross1Cross2	1.26594e-08
Df(3L)ED4196	8054	Idgf3OE	62	38	2	102	68	31	3	102	2ndCross1Cross2
Df(3L)Exel6087	7566	Idgf3OE	74	38	2	114	68	31	3	102	2ndCross1Cross2
Df(3L)ED230*	8089	W1118
Df(3L)BSC451	24955							97	91	16
Df(3L)TO2	51608	Idgf3OE	100	15	0	115	68	31	3	102	2ndCross1Cross2	0.0006
Df(3L)BSC554	25669	Idgf3OE	67	18	2	87	68	31	3	102	2ndCross1Cross2	0.15
Df(3L)BSC23*	6755	W1118	116	62	8	186	N/A	N/A	N/A	N/A	C415Gal4DF
Df(3L)BSC671*	26523	W1118	104	39	1	144	N/A	N/A	N/A		NarrowingDownDFs
Df(3L)BSC671	26523	C415Gal4IDgf3OE	54	52	4	110	40	2	0	42	NarrowingDownDFs
Df(3L)Exel6092*	7571	W1118	80	22	0	102	N/A	N/A			NarrowingDownDFs
Df(3L)Exel6092*	7571	C415Gal4IDgf3OE	116	54	1	171	116	98	5	219	NarrowingDownDFs
Df(3L)BSC119*	8976	W1118	32	19	0	51	N/A	N/A			NarrowingDownDFs
Df(3L)BSC119*	8976	C415Gal4IDgf3OE	76	65	1	142	116	98	5	219	NarrowingDownDFs
Df(3L)ED4502*+	8097	C415Gal4	62	69	0	131	78	21	29	128
Df(3L)ED4502*+	8097	CY2GAL4	97	91	16	204	140	10	0	150
Df(3L)ED4502*+	8097	CY2GAL4	64	129	29	222	140	15	3	158
Df(3L)ED4502*+	8097	Cy2GaAL4	65	153	41	259	138	24	1	163
Df(3L)ED4502*+	8097	Idgf3OE	65	167	15	247	147	64	2	213
Df(3L)ED4502*+	8097	Idgf3OE	3	51	5	59	60	101	6	167
Df(3L)ED4502*+	8097	Idgf3OE	15	219	45	279	112	79	13	204
Df(3L)ED4543*	8073
Df(3L)Exel6119	7598	Cy2GAL4	54	158	76	288	82	6	0	88	Narrowing down cmb
Df(3L)Exel6119	7598	Idgf3OE	31	131	72	234	52	15	3	70	Narrowing down cmb
Df(3L)BSC614	25689	Cy2GaAL4	94	19	0	113	82	6	0	88	Narrowing down cmb
Df(3L)BSC614	25689	IDgf3OE	68	49	4	121	52	15	3	70	Narrowing down cmb
B28020	B28020	Idgf3OE	79	28	0	107	79	34	1	114
B34394	B34394	Idgf3OE	82	21	0	103	79	34	1	114
V109767	V109767	Idgf3OE	61	61	0	122	79	34	1	114
Andreas Jenny	cmbKO	Cy2GaAL4	162	22	0	184	140	10	0	150
Andreas Jenny	cmbKO	Cy2GaAL4	97	6	0	103	140	15	3	158
Andreas Jenny	cmbKO	Cy2GaAL4	89	4	0	93	138	24	1	163
Andreas Jenny	cmbKO	Idgf3OE	109	80	0	189	147	64	2	213
Andreas Jenny	cmbKO	Idgf3OE	55	133	0	188	60	101	6	167
Andreas Jenny	cmbKO	Idgf3OE	67	99	1	167	112	79	13	204
Andreas Jenny	UAS-cmbRB	Cy2GaAL4	117	6	0	123	140	10	0	150
Andreas Jenny	UAS-cmbRB	Cy2GaAL4	102	27	1	130	140	15	3	158
Andreas Jenny	UAS-cmbRB	Cy2GaAL4	85	13	0	98	138	24	1	163
Andreas Jenny	UAS-cmbRB	Idgf3OE	83	17	0	100	147	64	2	213
Andreas Jenny	UAS-cmbRB	Idgf3OE	45	12	0	57	60	101	6	167
Andreas Jenny	UAS-cmbRB	Idgf3OE	45	30	1	76	112	79	13	204
*Original defiency
+three biological replicas

## Sheet: Sheet2
S10BA	87
S10BB	48
S10Bc	28
S10BD	78
S12A	74
S12B	60
S12C	63
S12D	59
	62.125
